# Supplementary material
Source: Springer Nature journal article supplement (https://www.springermedizin.de/resource/supplementary/13049_2011_273_MOESM1_ESM.pdf/9666236)

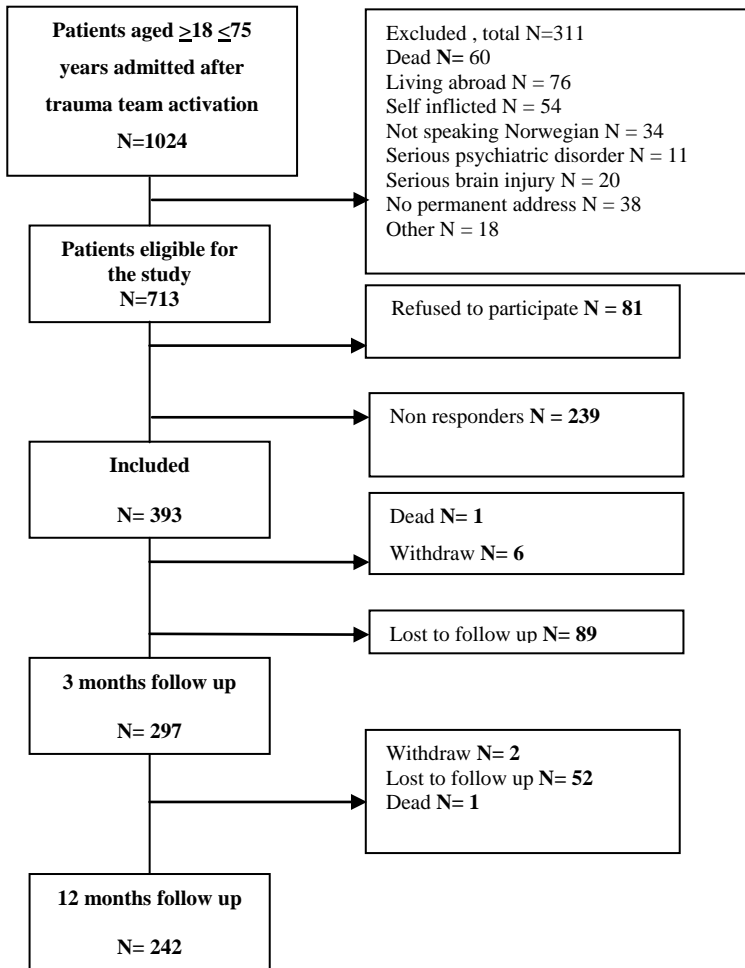

Supplement: MOESM1 [file 9666236]
